# Supplementary material for: Awareness of sex and gender dimensions among physicians: the European federation of internal medicine assessment of gender differences in Europe (EFIM-IMAGINE) survey
Source: PubMed Central journal article supplement (PMC9352607; doi:10.1007/s11739-022-02951-9), 2022-05-23
Supplement: 11739_2022_2951_MOESM1_ESM.pdf [file 11739_2022_2951_MOESM1_ESM.pdf]

1 Supplemental Figure 1  
2

IMAGINE SURVEY

Do you think that the terms "SEX" and "GENDER" are synonymous? \*

- Yes
- No
- I do not know

Sex/Gender awareness

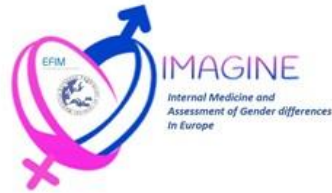

At the best of your knowledge, in randomized control trials to register new drugs which is the average percentage of women enrollment? \*

- <10%
- 10-30%
- 31-50%
- 51-70%
- >70%

Have you ever read in clinical guidelines if any recommendation is proposed specifically for men or women? \*

- Yes
- No

If Yes, which guideline you refer to? (If no, please leave this section blank)

La tua risposta \_\_\_\_\_

Among the following topics which are the ones you are most interested in knowing if sex and gender differences exist and influence the clinical management? (please max 3 answers) \*

- Cardiovascular Diseases
- Vascular disease other than cardiac ones
- Intestinal Bowel Diseases
- Kidney Diseases
- Cerebral Diseases/Cognitive Diseases
- Lung Diseases
- Infectious Diseases
- Immunological Diseases
- Rheumatological Diseases
- Liver Diseases
- Blood Diseases
- Metabolic diseases

Please, read the following statements, and indicate how much you agree or disagree with each one of them \*

|                                                                                                     | Strongly agree           | Somewhat agree           | Somewhat disagree        | Strongly disagree        | Don't know               | Decline to answer        |
|-----------------------------------------------------------------------------------------------------|--------------------------|--------------------------|--------------------------|--------------------------|--------------------------|--------------------------|
| The term "sex" should be used when reporting biological factors                                     | <input type="checkbox"/> | <input type="checkbox"/> | <input type="checkbox"/> | <input type="checkbox"/> | <input type="checkbox"/> | <input type="checkbox"/> |
| The term "gender" should be used when reporting gender identity or psychosocial or cultural factors | <input type="checkbox"/> | <input type="checkbox"/> | <input type="checkbox"/> | <input type="checkbox"/> | <input type="checkbox"/> | <input type="checkbox"/> |
| Sex and gender can interact in influencing health disease                                           | <input type="checkbox"/> | <input type="checkbox"/> | <input type="checkbox"/> | <input type="checkbox"/> | <input type="checkbox"/> | <input type="checkbox"/> |
| Sex and gender are determinants of health along all life phases                                     | <input type="checkbox"/> | <input type="checkbox"/> | <input type="checkbox"/> | <input type="checkbox"/> | <input type="checkbox"/> | <input type="checkbox"/> |
| Sex and gender should be considered in research planning to personalize the management of disease   | <input type="checkbox"/> | <input type="checkbox"/> | <input type="checkbox"/> | <input type="checkbox"/> | <input type="checkbox"/> | <input type="checkbox"/> |
| There is lack of evidence exploring sex and gender differences in clinical research                 | <input type="checkbox"/> | <input type="checkbox"/> | <input type="checkbox"/> | <input type="checkbox"/> | <input type="checkbox"/> | <input type="checkbox"/> |
| I always look for sex and gender specific information when prescribing medication                   | <input type="checkbox"/> | <input type="checkbox"/> | <input type="checkbox"/> | <input type="checkbox"/> | <input type="checkbox"/> | <input type="checkbox"/> |
| In clinical trials a sex stratified analysis should be always planned                               | <input type="checkbox"/> | <input type="checkbox"/> | <input type="checkbox"/> | <input type="checkbox"/> | <input type="checkbox"/> | <input type="checkbox"/> |

We are interested in knowing your opinion on how much awareness on sex and gender differences in health and disease and their management exist in your country. Please, read the following categories of health disease, and indicate the ones that you believe are influenced by sex and gender in your environment. \*

|                                          | Strongly agree           | Somewhat agree           | Somewhat disagree        | Strongly disagree        | I do not know            | Decline to answer        |
|------------------------------------------|--------------------------|--------------------------|--------------------------|--------------------------|--------------------------|--------------------------|
| Cardiovascular Diseases                  | <input type="checkbox"/> | <input type="checkbox"/> | <input type="checkbox"/> | <input type="checkbox"/> | <input type="checkbox"/> | <input type="checkbox"/> |
| Vascular disease other than cardiac ones | <input type="checkbox"/> | <input type="checkbox"/> | <input type="checkbox"/> | <input type="checkbox"/> | <input type="checkbox"/> | <input type="checkbox"/> |
| Intestinal Bowel Diseases                | <input type="checkbox"/> | <input type="checkbox"/> | <input type="checkbox"/> | <input type="checkbox"/> | <input type="checkbox"/> | <input type="checkbox"/> |
| Kidney Diseases                          | <input type="checkbox"/> | <input type="checkbox"/> | <input type="checkbox"/> | <input type="checkbox"/> | <input type="checkbox"/> | <input type="checkbox"/> |
| Cerebral Disease/Cognitive Diseases      | <input type="checkbox"/> | <input type="checkbox"/> | <input type="checkbox"/> | <input type="checkbox"/> | <input type="checkbox"/> | <input type="checkbox"/> |
| Lung Diseases                            | <input type="checkbox"/> | <input type="checkbox"/> | <input type="checkbox"/> | <input type="checkbox"/> | <input type="checkbox"/> | <input type="checkbox"/> |
| Infectious Diseases                      | <input type="checkbox"/> | <input type="checkbox"/> | <input type="checkbox"/> | <input type="checkbox"/> | <input type="checkbox"/> | <input type="checkbox"/> |
| Autoimmune Diseases                      | <input type="checkbox"/> | <input type="checkbox"/> | <input type="checkbox"/> | <input type="checkbox"/> | <input type="checkbox"/> | <input type="checkbox"/> |
| Rheumatic Diseases                       | <input type="checkbox"/> | <input type="checkbox"/> | <input type="checkbox"/> | <input type="checkbox"/> | <input type="checkbox"/> | <input type="checkbox"/> |
| Liver Diseases                           | <input type="checkbox"/> | <input type="checkbox"/> | <input type="checkbox"/> | <input type="checkbox"/> | <input type="checkbox"/> | <input type="checkbox"/> |
| Blood Diseases                           | <input type="checkbox"/> | <input type="checkbox"/> | <input type="checkbox"/> | <input type="checkbox"/> | <input type="checkbox"/> | <input type="checkbox"/> |
| Metabolic Diseases                       | <input type="checkbox"/> | <input type="checkbox"/> | <input type="checkbox"/> | <input type="checkbox"/> | <input type="checkbox"/> | <input type="checkbox"/> |
| Mental disorders                         | <input type="checkbox"/> | <input type="checkbox"/> | <input type="checkbox"/> | <input type="checkbox"/> | <input type="checkbox"/> | <input type="checkbox"/> |
| General use of drugs and medications     | <input type="checkbox"/> | <input type="checkbox"/> | <input type="checkbox"/> | <input type="checkbox"/> | <input type="checkbox"/> | <input type="checkbox"/> |

Please for the following variables select the most appropriate condition (tick the ones you think are sex-related, gender-related or both or not?) \*

|                      | Sex Related                         | Gender Related                      | No sex and gender related | I don't know             |
|----------------------|-------------------------------------|-------------------------------------|---------------------------|--------------------------|
| Age                  | <input type="checkbox"/>            | <input type="checkbox"/>            | <input type="checkbox"/>  | <input type="checkbox"/> |
| Genetics             | <input type="checkbox"/>            | <input type="checkbox"/>            | <input type="checkbox"/>  | <input type="checkbox"/> |
| Sex Hormones         | <input checked="" type="checkbox"/> | <input checked="" type="checkbox"/> | <input type="checkbox"/>  | <input type="checkbox"/> |
| Reproductive status  | <input checked="" type="checkbox"/> | <input checked="" type="checkbox"/> | <input type="checkbox"/>  | <input type="checkbox"/> |
| Marital Status       | <input checked="" type="checkbox"/> | <input checked="" type="checkbox"/> | <input type="checkbox"/>  | <input type="checkbox"/> |
| Ethnicity            | <input checked="" type="checkbox"/> | <input checked="" type="checkbox"/> | <input type="checkbox"/>  | <input type="checkbox"/> |
| Personality Traits   | <input type="checkbox"/>            | <input type="checkbox"/>            | <input type="checkbox"/>  | <input type="checkbox"/> |
| Body Composition     | <input type="checkbox"/>            | <input type="checkbox"/>            | <input type="checkbox"/>  | <input type="checkbox"/> |
| Religion             | <input type="checkbox"/>            | <input type="checkbox"/>            | <input type="checkbox"/>  | <input type="checkbox"/> |
| Diet                 | <input checked="" type="checkbox"/> | <input checked="" type="checkbox"/> | <input type="checkbox"/>  | <input type="checkbox"/> |
| Smoking Habit        | <input checked="" type="checkbox"/> | <input checked="" type="checkbox"/> | <input type="checkbox"/>  | <input type="checkbox"/> |
| Alcohol              | <input checked="" type="checkbox"/> | <input checked="" type="checkbox"/> | <input type="checkbox"/>  | <input type="checkbox"/> |
| Sexual Orientation   | <input type="checkbox"/>            | <input type="checkbox"/>            | <input type="checkbox"/>  | <input type="checkbox"/> |
| Environment          | <input type="checkbox"/>            | <input type="checkbox"/>            | <input type="checkbox"/>  | <input type="checkbox"/> |
| Working Status       | <input type="checkbox"/>            | <input type="checkbox"/>            | <input type="checkbox"/>  | <input type="checkbox"/> |
| Body size            | <input checked="" type="checkbox"/> | <input checked="" type="checkbox"/> | <input type="checkbox"/>  | <input type="checkbox"/> |
| Geographic Location  | <input checked="" type="checkbox"/> | <input checked="" type="checkbox"/> | <input type="checkbox"/>  | <input type="checkbox"/> |
| Disability           | <input checked="" type="checkbox"/> | <input checked="" type="checkbox"/> | <input type="checkbox"/>  | <input type="checkbox"/> |
| Co-Morbidities       | <input type="checkbox"/>            | <input type="checkbox"/>            | <input type="checkbox"/>  | <input type="checkbox"/> |
| Socioeconomic Status | <input type="checkbox"/>            | <input type="checkbox"/>            | <input type="checkbox"/>  | <input type="checkbox"/> |
